# Supplementary material for: A tetracobalt(ii) cluster with a two vertex truncated dicubane topology endogenously supported by carboxylate-based (2-pyridyl)methylamine ligands: magneto-structural and DFT studies
Source: Royal Society of Chemistry journal article supplement (doi:10.1039/d3dt01131c), 2023-01-01
Supplement: d3dt01131c1.pdf [file d3dt01131c1.pdf]

## Electronic Supporting Information

### **Tetracobalt(II) cluster with two vertex truncated dicubane topology endogenously supported by carboxylate-based (2-pyridyl)methylamine ligands: magneto-structural and DFT study**

Shashi Kant, Sayan Saha, Francesc Lloret, Joan Cano\* and Rabindranath Mukherjee\*

---

#### **Figures**

**Fig. S1** IR spectrum of  $[\text{Co}^{\text{II}}_4\{\text{L}^3\text{-(CO}_2^-)_2\}_2(\mu_3\text{-OCH}_3)_2(\text{CH}_3\text{OH})_2(\text{H}_2\text{O})_2\text{Cl}_2]$  (**1**).

**Fig. S2**  $^1\text{H}$  NMR spectrum of **1** in  $\text{CD}_3\text{OD}$ .

**Fig. S3** Crystal packing diagram, showing  $\text{O-H}\cdots\text{O}$ ,  $\text{C-H}\cdots\text{O}$ ,  $\text{C-H}\cdots\text{Cl}$  and  $\text{C-H}\cdots\pi$  interactions of  $[\text{Co}^{\text{II}}_4\{\text{L}^3\text{-(CO}_2^-)_2\}_2(\mu_3\text{-OCH}_3)_2(\text{CH}_3\text{OH})_2(\text{H}_2\text{O})_2\text{Cl}_2]$  (**1**).

**Fig. S4** XPRD spectra of  $[\text{Co}^{\text{II}}_4\{\text{L}^3\text{-(CO}_2^-)_2\}_2(\mu_3\text{-OCH}_3)_2(\text{CH}_3\text{OH})_2(\text{H}_2\text{O})_2\text{Cl}_2]$  (**1**).

**Fig. S5** UV-VIS spectrum of  $[\text{Co}^{\text{II}}_4\{\text{L}^3\text{-(CO}_2^-)_2\}_2(\mu_3\text{-OCH}_3)_2(\text{CH}_3\text{OH})_2(\text{H}_2\text{O})_2\text{Cl}_2]$  (**1**) in  $\text{CH}_3\text{CN-MeOH}$  (2:1; v/v).

#### **Tables**

**Table S1.** Data Collection and Structure Refinement Parameters for  $[\text{Co}_4\{\text{L}^3\text{-(CO}_2^-)_2\}_2(\mu_3\text{-OCH}_3)_2(\text{CH}_3\text{OH})_2(\text{H}_2\text{O})_2\text{Cl}_2]$  (**1**)

**Table S2.** Hydrogen-bonding parameters in **1**

**Table S3.** Calculated spin configurations and their relative energies as a function of different  $J_i$  constants

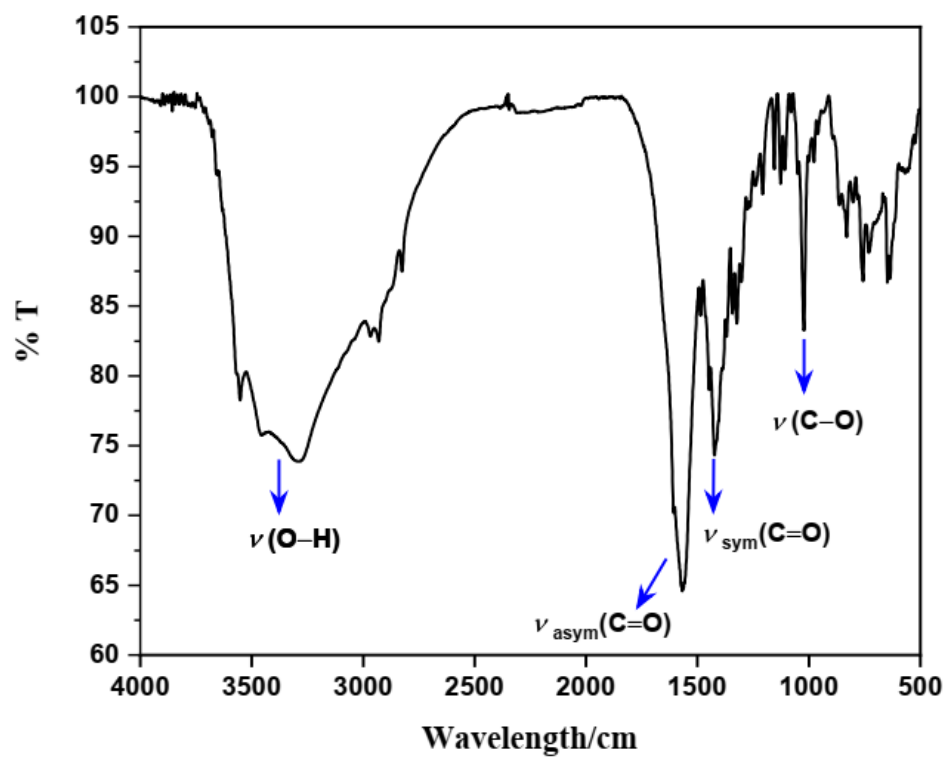

**Fig. S1** FT-IR spectrum of  $[\text{Co}^{\text{II}}_4\{\text{L}^3\text{-(CO}_2^-)_2\}_2(\mu_3\text{-OCH}_3)_2(\text{CH}_3\text{OH})_2(\text{H}_2\text{O})_2\text{Cl}_2]$  (**1**).

Co Tetramer

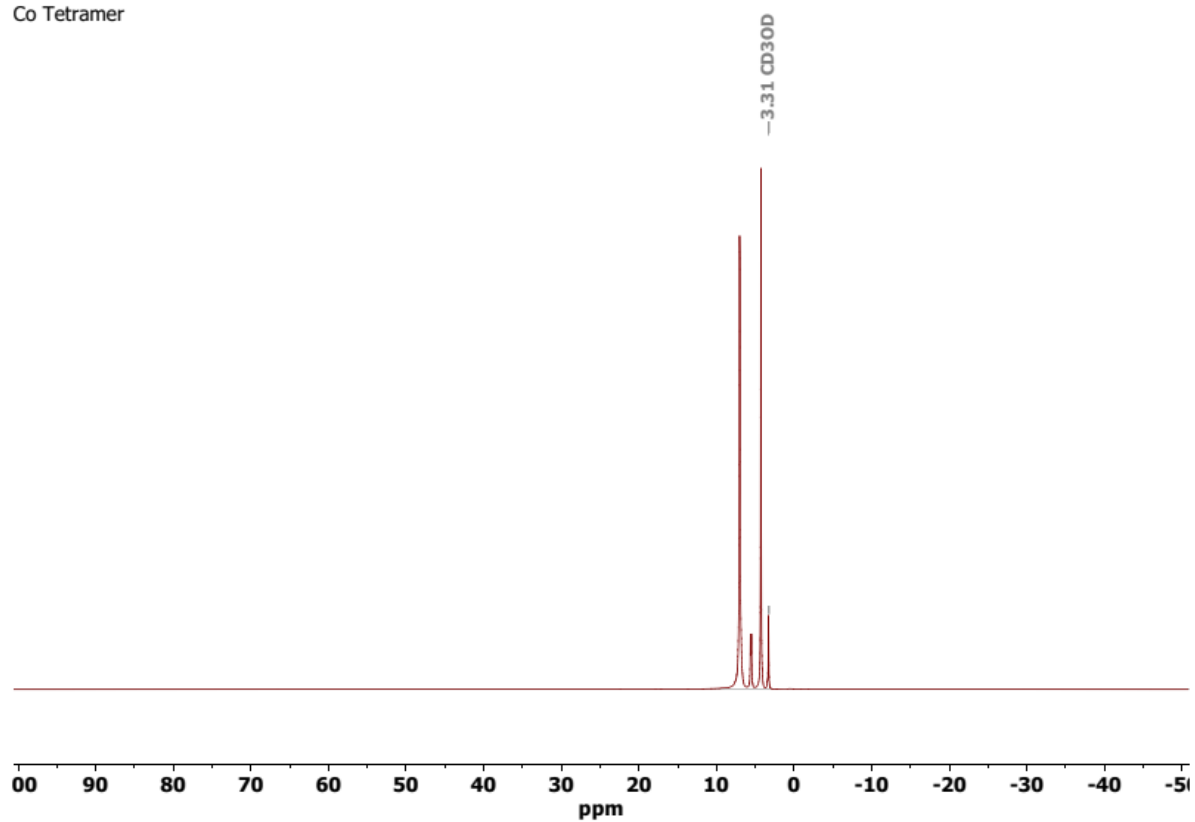

Fig. S2  $^1\text{H}$  NMR spectrum of **1** in  $\text{CD}_3\text{OD}$ .

(a)

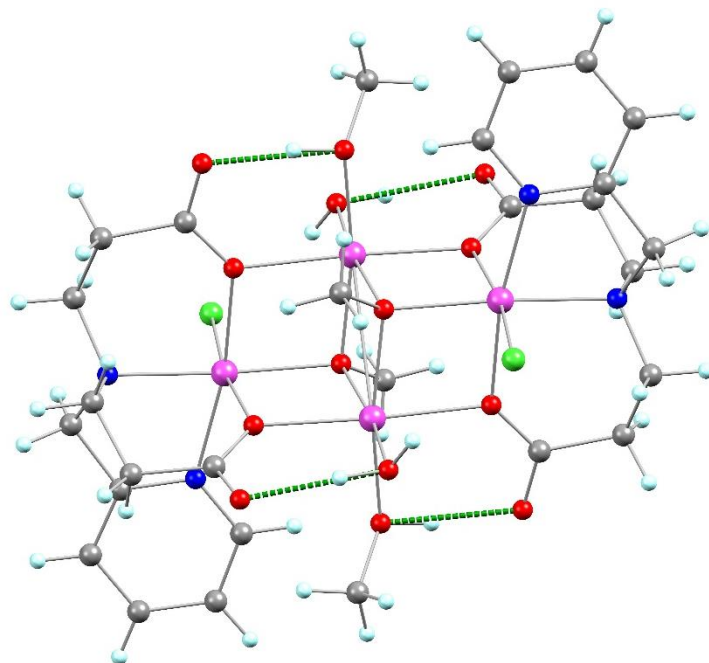

(b)

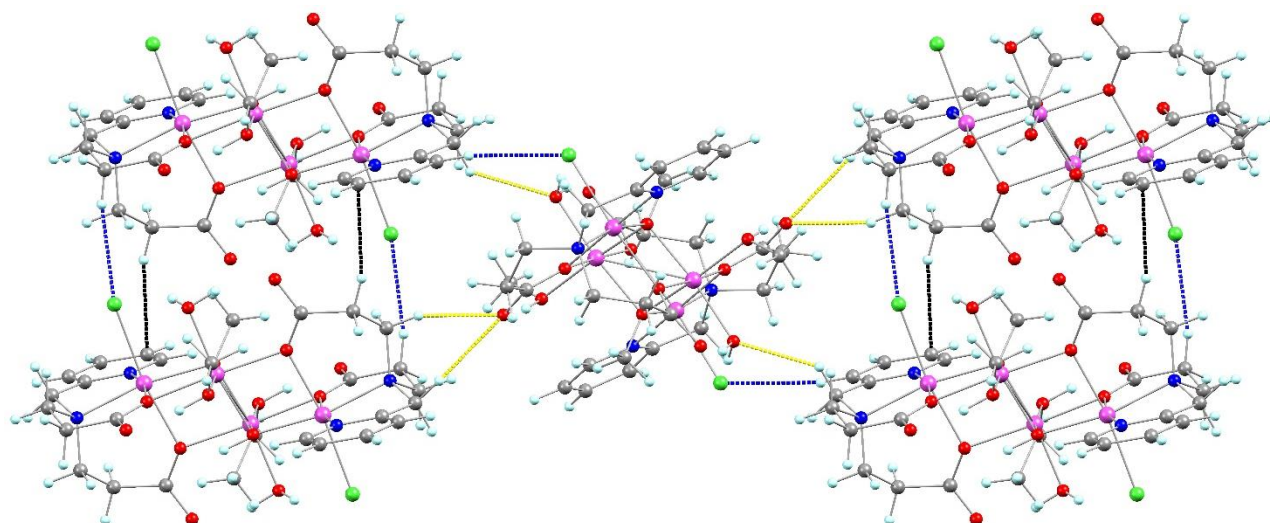

**Fig. S3** Crystal packing diagram, (a) showing intramolecular O–H...O (in green) and (b) intermolecular C–H...O (in yellow) and C–H...Cl (in blue) C–H... $\pi$  (in black) interactions of  $[\text{Co}^{\text{II}}_4\{\text{L}^3\text{-(CO}_2^-)_2\}_2(\mu_3\text{-OCH}_3)_2(\text{CH}_3\text{OH})_2(\text{H}_2\text{O})_2\text{Cl}_2]$  (**1**).

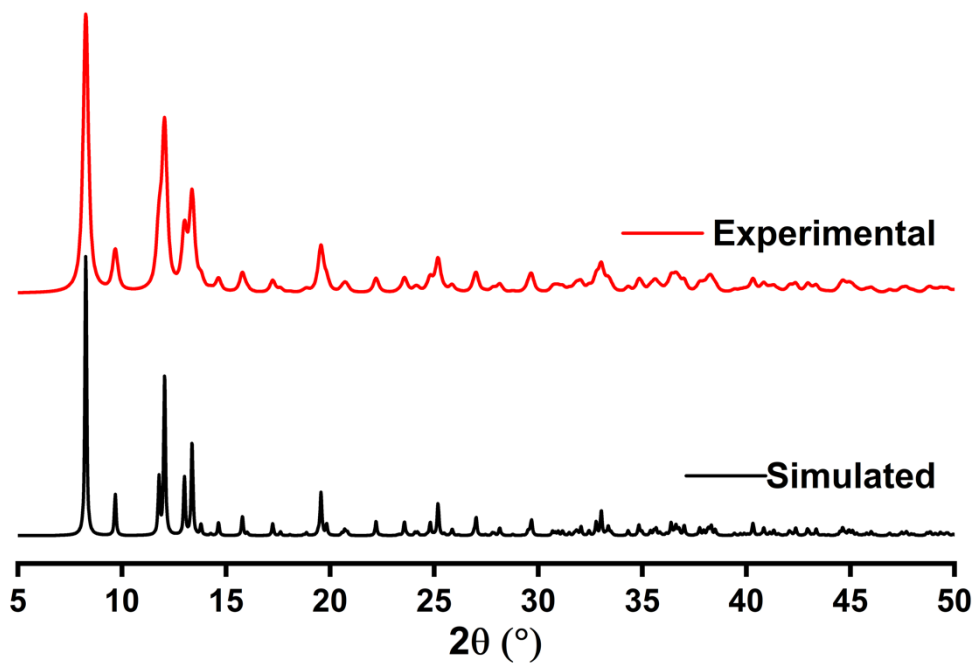

**Fig. S4** XPRD spectra of  $[\text{Co}^{\text{II}}_4\{\text{L}^3\text{-(CO}_2^-)_2\}_2(\mu_3\text{-OCH}_3)_2(\text{CH}_3\text{OH})_2(\text{H}_2\text{O})_2\text{Cl}_2]$  (**1**).

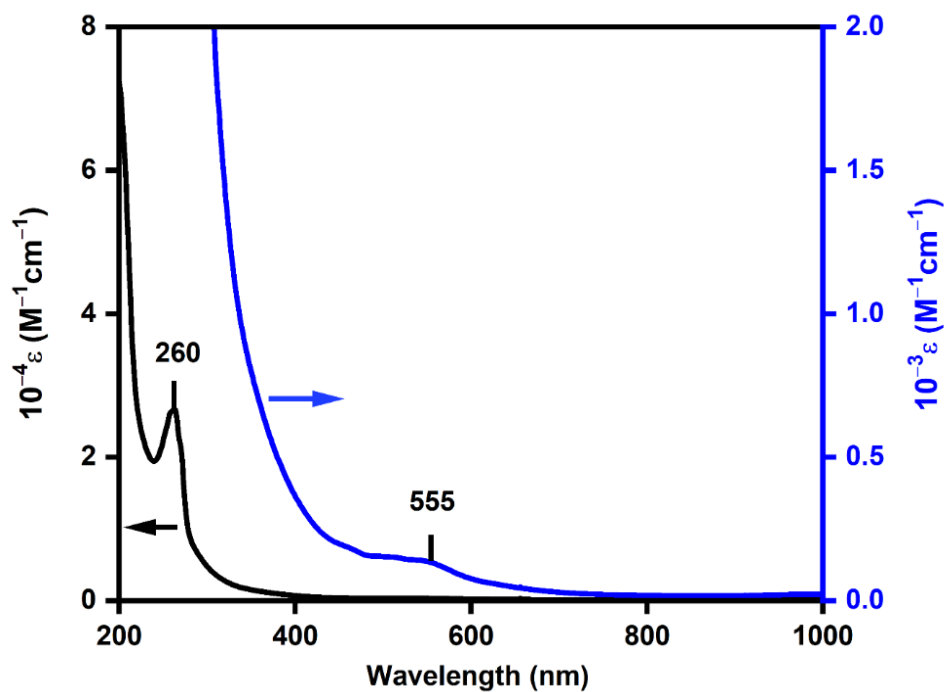

**Fig. S5** UV-Vis spectrum of  $[\text{Co}^{\text{II}}_4\{\text{L}^3\text{-(CO}_2^-)_2\}_2(\mu_3\text{-OCH}_3)_2(\text{CH}_3\text{OH})_2(\text{H}_2\text{O})_2\text{Cl}_2]$  **1** in  $\text{CH}_3\text{CN-CH}_3\text{OH}$  (2:1; v/v).

**Table S1.** Data Collection and Structure Refinement Parameters for [Co<sub>4</sub>{L<sup>3</sup>-(CO<sub>2</sub><sup>-</sup>)<sub>2</sub>}(μ<sub>3</sub>-OCH<sub>3</sub>)<sub>2</sub>(CH<sub>3</sub>OH)<sub>2</sub>(H<sub>2</sub>O)<sub>2</sub>Cl<sub>2</sub>] (**1**)

| <b>1</b>                                                                                                              |                                                                                                           |
|-----------------------------------------------------------------------------------------------------------------------|-----------------------------------------------------------------------------------------------------------|
| Formula                                                                                                               | C <sub>28</sub> H <sub>46</sub> Cl <sub>2</sub> Co <sub>4</sub> N <sub>4</sub> O <sub>14</sub>            |
| Formula weight                                                                                                        | 969.31                                                                                                    |
| Crystal colour, habit                                                                                                 | red, block                                                                                                |
| <i>T</i> / K                                                                                                          | 100(2)                                                                                                    |
| Crystal system                                                                                                        | Monoclinic                                                                                                |
| Space group                                                                                                           | <i>P</i> 2 <sub>1</sub> / <i>n</i> (no. 14)                                                               |
| <i>a</i> /Å                                                                                                           | 7.694(5)                                                                                                  |
| <i>b</i> /Å                                                                                                           | 13.188(5)                                                                                                 |
| <i>c</i> /Å                                                                                                           | 18.365(5)                                                                                                 |
| <i>α</i> /°                                                                                                           | 90.0                                                                                                      |
| <i>β</i> /°                                                                                                           | 96.099(5)                                                                                                 |
| <i>γ</i> /°                                                                                                           | 90.0                                                                                                      |
| <i>V</i> /Å <sup>3</sup>                                                                                              | 1852.9(15)                                                                                                |
| <i>Z</i>                                                                                                              | 2                                                                                                         |
| <i>D<sub>c</sub></i> /g cm <sup>-3</sup>                                                                              | 1.737                                                                                                     |
| <i>μ</i> /mm <sup>-1</sup>                                                                                            | 1.973                                                                                                     |
| Reflections measured                                                                                                  | 9843                                                                                                      |
| Unique reflections/ <i>R</i> <sub>int</sub>                                                                           | 3436/0.0383                                                                                               |
| Reflections used<br><i>I</i> > 2σ( <i>I</i> )                                                                         | 2712                                                                                                      |
| <i>R</i> <sub>1</sub> <sup><i>a</i></sup> , <i>wR</i> <sub>2</sub> <sup><i>b</i></sup><br>[ <i>I</i> > 2σ( <i>I</i> ) | <i>R</i> <sub>1</sub> = 0.0404 <sup><i>a</i></sup><br><i>wR</i> <sub>2</sub> = 0.0975 <sup><i>b</i></sup> |
| <i>R</i> <sub>1</sub> <sup><i>a</i></sup> , <i>wR</i> <sub>2</sub> <sup><i>b</i></sup><br>(all data)                  | <i>R</i> <sub>1</sub> = 0.0546 <sup><i>a</i></sup><br><i>wR</i> <sub>2</sub> = 0.1075 <sup><i>b</i></sup> |
| GOF on <i>F</i> <sup>2</sup>                                                                                          | 1.037                                                                                                     |

$${}^a R_1 = \Sigma(|F_o| - |F_c|)/\Sigma|F_o|. \quad {}^b wR_2 = \{\Sigma[w(|F_o|^2 - |F_c|^2)^2] / \Sigma[w(|F_o|^2)^2]\}^{1/2}$$

**Table S2.** Hydrogen-bonding parameters in **1**

| D–H $\cdots$ A        | H $\cdots$ A, Å | D $\cdots$ A, Å |
|-----------------------|-----------------|-----------------|
| O7–H7 $\cdots$ O4     | 1.646           | 2.563           |
| O6–H6D $\cdots$ O2    | 1.820           | 2.690           |
| C11–H11B $\cdots$ Cl1 | 2.852           | 3.816           |
| C4–H4 $\cdots$ Cl1    | 2.834           | 3.736           |
| C6–H6A $\cdots$ O6    | 2.539           | 3.273           |
| C7–H7A $\cdots$ O4    | 2.437           | 3.382           |
| C6–H6B $\cdots$ O4    | 2.690           | 3.542           |
| C8–H8B $\cdots$ $\pi$ | 2.753           | 3.715           |

**Table S3** Calculated spin configurations and their relative energies as a function of different  $J_i$  constants. The spin configuration used as a reference is that with the maximum multiplicity generated from the parallel alignment of all local spin moments of the Co<sup>II</sup> ions. Only the centres with an antiparallel (negative) alignment of their spin moment are noted.

| Spin conf.                            | S | $J_1$ | $J_2$ | $J_3$ | Energy <sup>a</sup> |
|---------------------------------------|---|-------|-------|-------|---------------------|
| {Co2,Co2 <sup>#</sup> }               | 0 | 12    | 12    | 0     | –52.53              |
| {Co1 <sup>#</sup> ,Co2}               | 0 | 12    | 0     | 6     | +78.94              |
| {Co1 <sup>#</sup> ,Co2 <sup>#</sup> } | 0 | 0     | 12    | 6     | –1.55               |
| {Co2 <sup>#</sup> }                   | 3 | 6     | 6     | 6     | +38.57              |
| {Co1}                                 | 3 | 6     | 6     | 0     | –26.10              |

<sup>a</sup>In cm<sup>–1</sup>.
